# Supplementary material for: Role of oxygen impurity on the mechanical stability and atomic cohesion of Ta3N5 semiconductor photocatalyst
Source: Royal Society of Chemistry journal article supplement (doi:10.1039/c4cp00120f), 2014-01-01
Supplement: c4cp00120f1.pdf [file c4cp00120f1.pdf]

## Support Information

For

### **Role of oxygen impurity on the mechanical stability and atomic cohesion of Ta<sub>3</sub>N<sub>5</sub> semiconductor photocatalyst**

Jiajia Wang, Jianyong Feng, Li Zhang, Zhaosheng Li\* and Zhigang Zou\*

*National Laboratory of Solid State Microstructures, Department of Physics, Ecomaterials and Renewable Energy Research Center (ERERC), and College of Engineering and Applied Sciences, Nanjing University, 22 Hankou Road, Nanjing 210093, People's Republic of China.*

\*Corresponding Authors: Tel: +86-25-83686630, Fax: +86-25-83686632, E-mail: [zsli@nju.edu.cn](mailto:zsli@nju.edu.cn) or [zgrou@nju.edu.cn](mailto:zgrou@nju.edu.cn)

The elastic constants of orthorhombic crystals are calculated using the method proposed by Ravindran<sup>1</sup>, et al. Since the calculation procedures of all elastic constants are almost identical, we then only use  $c_{44}$  as an example to conduct a detailed discussion.

If we apply following distortion matrices

$$\begin{pmatrix} \frac{1}{(1-\delta^2)^{1/3}} & 0 & 0 \\ 0 & \frac{1}{(1-\delta^2)^{1/3}} & \frac{\delta}{(1-\delta^2)^{1/3}} \\ 0 & \frac{\delta}{(1-\delta^2)^{1/3}} & \frac{1}{(1-\delta^2)^{1/3}} \end{pmatrix} \quad (\text{S-1})$$

to the lattice of Ta<sub>3</sub>N<sub>5</sub> (where  $\delta$  is lattice strain), the total energy of Ta<sub>3</sub>N<sub>5</sub> associated with this distortion can be expressed as:

$$E(V, \delta) = E(V_0, 0) + V_0(2\tau_4\delta + 2c_{44}\delta^2) \quad (\text{S-2})$$

where  $V_0$  and  $E(V_0, 0)$  are the volume and total energy of the unstrained  $\text{Ta}_3\text{N}_5$ , respectively, and  $\tau_4$  is the strain tensor. It is seen that, the elastic constants  $c_{44}$  can be extracted from the second derivative of the total energy  $E(V, \delta)$ . With the lattice strain  $\delta$  varying from -0.01 to 0.01 (interval = 0.0025), we can get corresponding total energies  $E(V, \delta)$ . The dependence of total energy  $E(V, \delta)$  on the lattice strain  $\delta$  is shown in Fig. S1. Based on the second-order polynomial fit, the value of  $2V_0c_{44}$  is determined. After dividing  $2V_0c_{44}$  by  $2V_0$ , we can get the elastic constant  $c_{44}$ .

After obtaining all elastic constants, the bulk modulus ( $B$ ), shear modulus ( $G$ ) and Young's modulus ( $E$ ) can be derived from the Voigt-Reuss-Hill approximation<sup>2</sup>. More calculation details of modulus please refer to Ravindran<sup>1</sup>, et al.'s work. Using above mentioned energy-strain method, elastic constants and bulk modulus of  $\text{Ta}_2\text{N}_3$  are calculated and listed in Table S1. It is seen that, except the  $c_{66}$ , all our calculated elastic constants are in good agreement with other theoretical results<sup>3</sup>. The discrepancy in  $c_{66}$  between our results and other theoretical work may be ascribed to: (i) our calculation method is the energy-strain method, while the method in Ref. 3 is the stress-strain method; (ii) the stress amplitude used in our calculation varies from -0.01 to 0.01, which may be different from that in Ref. 3. However, the discrepancy in  $c_{66}$  does not affect the bulk modulus calculation, because bulk modulus calculation does not need  $c_{66}$ . Our calculated  $B$  of  $\text{Ta}_2\text{N}_3$  is 327 GPa, which is in good agreement with the result in Ref. 3 and the experimental value (319 GPa)<sup>4</sup>.

## References

1. P. Ravindran, L. Fast, P. Korzhavyi, B. Johansson, J. Wills and O. Eriksson, *J. Appl. Phys.*, 1998, **84**, 4891-4904.
2. R. Hill, *Proc. Phys. Soc.*, 1952, **65**, 349-354.
3. C. Jiang, Z. Lin and Y. Zhao, *Phys. Rev. Lett.*, 2009, **103**, 185501.
4. A. Friedrich, B. Winkler, L. Bayarjargal, E. A. Juarez Arellano, W. Morgenroth, J. Biehler, F. Schröder, J. Yan and S. M. Clark, *J. Alloys Compd.*, 2010, **502**, 5-12.

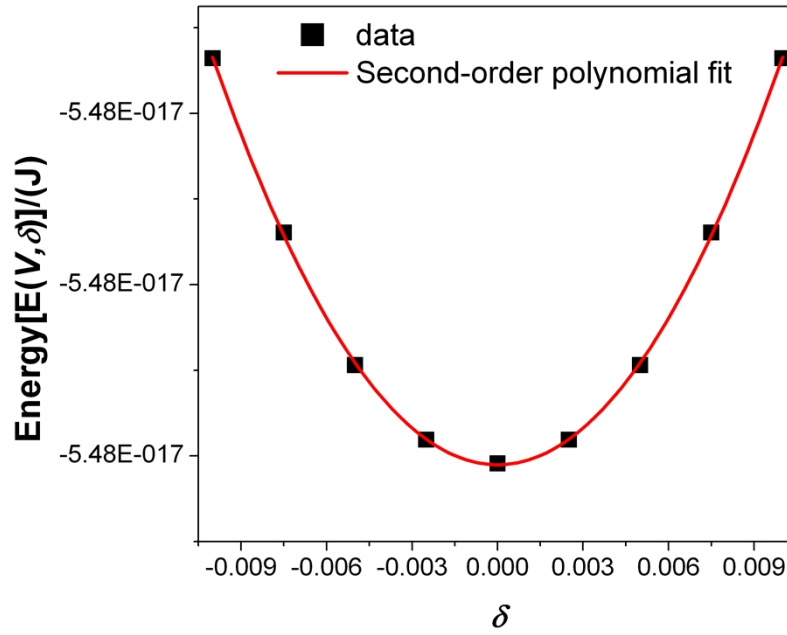

**Fig. S1.** Dependence of total energy  $E(V, \delta)$  on the lattice strain  $\delta$ .

**Table S1.** Calculated single-crystal elastic constants  $c_{ij}$  (GPa) and polycrystalline bulk modulus  $B$  (GPa) of  $\text{Ta}_2\text{N}_3$ .

|           | $c_{11}$ | $c_{22}$ | $c_{33}$ | $c_{44}$ | $c_{55}$ | $c_{66}$ | $c_{12}$ | $c_{13}$ | $c_{23}$ | $B^a$ |
|-----------|----------|----------|----------|----------|----------|----------|----------|----------|----------|-------|
| This work | 465      | 611      | 640      | 166      | 192      | -115     | 245      | 199      | 177      | 327   |
| Ref. 3    | 456      | 610      | 639      | 165      | 193      | -54      | 245      | 203      | 176      | 327   |

<sup>a</sup> Exp<sup>4</sup>. = 319 GPa
